# Supplementary material
Source: Springer Nature journal article supplement (https://www.springermedizin.de/resource/supplementary/12885_2008_1254_MOESM1_ESM.pdf/9471542)

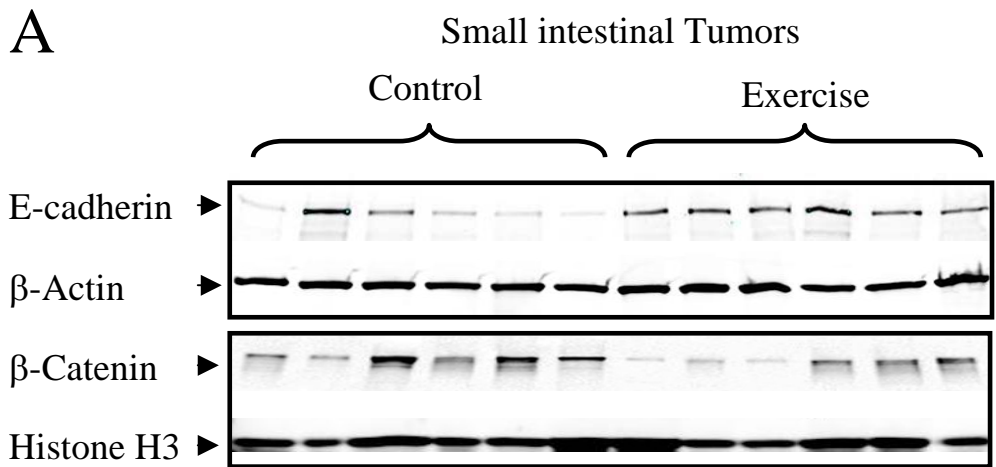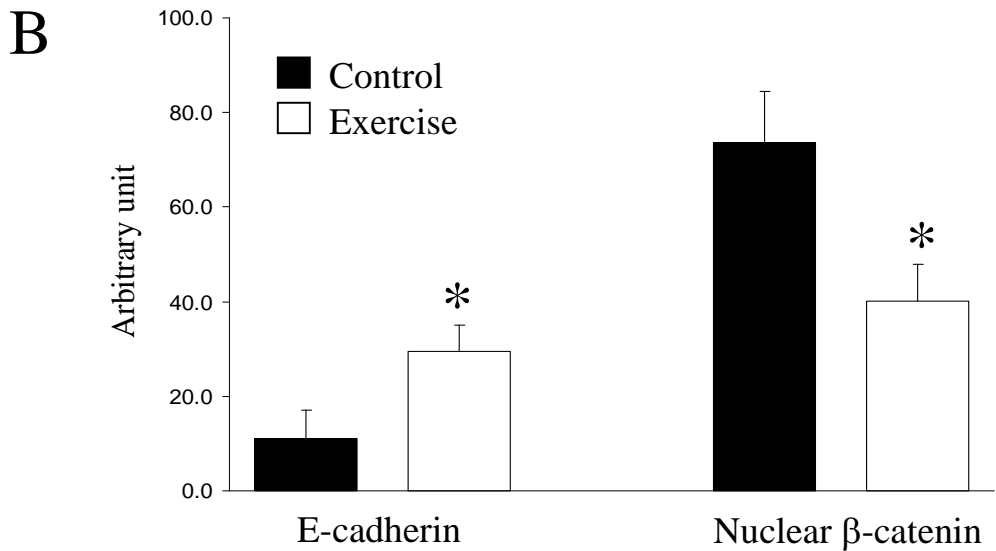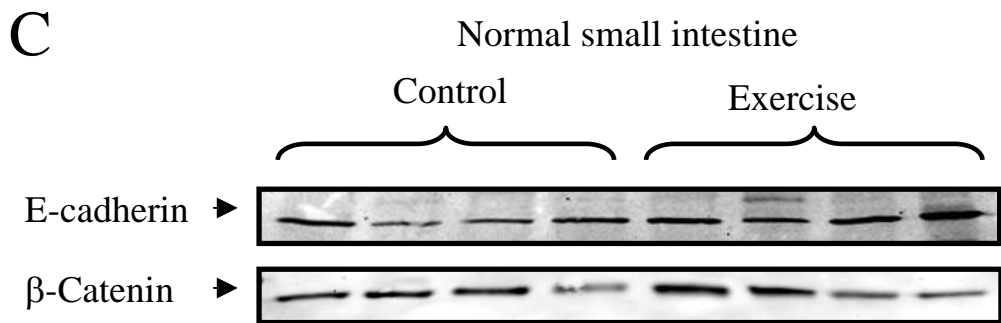

Supplement: MOESM1 [file 9471542]
